# Supplementary material
Source: PubMed Central journal article supplement (PMC3298077)
Supplement: supp_ddr325_ddr325supp.pdf [file supp_ddr325_ddr325supp.pdf]

**Supplementary Information for “Common Variants at *VRK2* and *TCF4* Conferring Risk of Schizophrenia”**

## Consortia membership

### Irish Schizophrenia Genomics Consortium

Corvin A<sup>1</sup>, Riley B<sup>2,3,4</sup>, Morris DW<sup>1</sup>, O'Dushlaine C<sup>1</sup>, Cormican P<sup>1</sup>, Donohoe G<sup>1</sup>, Maher B<sup>2,3,4</sup>, Walsh D<sup>5</sup>, O'Neill FA<sup>6</sup>, Gill M<sup>1</sup>, Kendler K<sup>2,3,4</sup>

<sup>1</sup>Neuropsychiatric Genetics Research Group, School of Medicine, Trinity College Dublin 8, Ireland

<sup>2</sup>Department of Psychiatry, Virginia Commonwealth University, Richmond, VA, USA

<sup>3</sup>Department of Human Genetics, Virginia Commonwealth University, Richmond, VA, USA

<sup>4</sup>Virginia Institute for Psychiatric and Behavioral Genetics, Virginia Commonwealth University, Richmond, VA, USA

<sup>5</sup>The Health Research Board, Dublin, Ireland

<sup>6</sup>Department of Psychiatry, Queens University, Belfast, UK

### Genetic Risk and Outcome in Psychosis (GROUP)

Rene´ S. Kahn<sup>1</sup>, Don H. Linszen<sup>2</sup>, Jim van Os<sup>3</sup>, Durk Wiersma<sup>4</sup>, Richard Bruggeman<sup>4</sup>, Wiepke Cahn<sup>1</sup>, Lieuwe de Haan<sup>2</sup>, Lydia Krabbendam<sup>3</sup>, & Inez Myin-Germeys<sup>3</sup>

<sup>1</sup>Department of Psychiatry, Rudolf Magnus Institute of Neuroscience, University Medical Center Utrecht, Postbus 85060, Utrecht, The Netherlands.

<sup>2</sup>Academic Medical Centre University of Amsterdam, Department of Psychiatry, Amsterdam, NL326 Groot-Amsterdam, The Netherlands.

<sup>3</sup>Maastricht University Medical Centre, South Limburg Mental Health Research and Teaching Network, 6229 HX Maastricht, The Netherlands.

<sup>4</sup>University Medical Center Groningen, Department of Psychiatry, University of Groningen, PO Box 30.001, 9700 RB Groningen, The Netherlands.

## Wellcome Trust Case Control Consortium 2

### Management Committee

Peter Donnelly (Chair)<sup>1,2</sup>, Leena Peltonen (Deputy Chair)<sup>3</sup>, Jenefer M Blackwell<sup>4,5</sup>, Elvira Bramon<sup>6</sup>, Matthew A Brown<sup>7</sup>, Juan P Casas<sup>8</sup>, Aiden Corvin<sup>9</sup>, Nicholas Craddock<sup>10</sup>, Panos Deloukas<sup>3</sup>, Audrey Duncanson<sup>11</sup>, Janusz Jankowski<sup>12</sup>, Hugh S Markus<sup>13</sup>, Christopher G Mathew<sup>14</sup>, Mark I McCarthy<sup>15</sup>, Colin NA Palmer<sup>16</sup>, Robert Plomin<sup>17</sup>, Anna Rautanen<sup>1</sup>, Stephen J Sawcer<sup>18</sup>, Nilesh Samani<sup>19</sup>, Richard C Trembath<sup>14</sup>, Ananth C Viswanathan<sup>20</sup>, Nicholas W Wood<sup>21</sup>

### Data and Analysis Group

Chris C A Spencer<sup>1</sup>, Gavin Band<sup>1</sup>, Céline Bellenguez<sup>1</sup>, Colin Freeman<sup>1</sup>, Garrett Hellenthal<sup>1</sup>, Eleni Giannoulidou<sup>1</sup>, Matti Pirinen<sup>1</sup>, Richard Pearson<sup>1</sup>, Amy Strange<sup>1</sup>, Zhan Su<sup>1</sup>, Damjan Vukcevic<sup>1</sup>, Peter Donnelly<sup>1,2</sup>

### DNA, Genotyping, Data QC and Informatics Group

Cordelia Langford<sup>3</sup>, Sarah E Hunt<sup>3</sup>, Sarah Edkins<sup>3</sup>, Rhian Gwilliam<sup>3</sup>, Hannah Blackburn<sup>3</sup>, Suzannah J Bumpstead<sup>3</sup>, Serge Dronov<sup>3</sup>, Matthew Gillman<sup>3</sup>, Emma Gray<sup>3</sup>, Naomi Hammond<sup>3</sup>, Alagurevathi Jayakumar<sup>3</sup>, Owen T McCann<sup>3</sup>, Jennifer Liddle<sup>3</sup>, Marc L Perez<sup>3</sup>, Simon C Potter<sup>3</sup>, Radhi Ravindrarajah<sup>3</sup>, Michelle Ricketts<sup>3</sup>, Matthew Waller<sup>3</sup>, Paul Weston<sup>3</sup>, Sara Widaa<sup>3</sup>, Pamela Whittaker<sup>3</sup>, Panos Deloukas<sup>3</sup>, Leena Peltonen<sup>3</sup>

### Publications Committee

Christopher G Mathew (Chair)<sup>14</sup>, Jenefer M Blackwell<sup>4,5</sup>, Matthew A Brown<sup>7</sup>, Aiden Corvin<sup>9</sup>, Mark I McCarthy<sup>15</sup>, Chris C A Spencer<sup>1</sup>

<sup>1</sup>Wellcome Trust Centre for Human Genetics, Roosevelt Drive, Oxford OX3 7LJ, UK; <sup>2</sup>Dept Statistics, University of Oxford, Oxford OX1 3TG, UK; <sup>3</sup>Wellcome Trust Sanger Institute, Wellcome Trust Genome Campus, Hinxton, Cambridge CB10 1SA, UK; <sup>4</sup>Telethon Institute for Child Health Research, Centre for Child Health Research, University of Western Australia, 100 Roberts Road, Subiaco, Western Australia 6008; <sup>5</sup>Cambridge Institute for Medical Research, University of Cambridge School of Clinical Medicine, Cambridge CB2 0XY, UK; <sup>6</sup>Division of Psychological Medicine and Psychiatry, Biomedical Research Centre for Mental Health at the Institute of Psychiatry, King's College London and The South

London and Maudsley NHS Foundation Trust, Denmark Hill, London SE5 8AF, UK; <sup>7</sup>Diamantina Institute of Cancer, Immunology and Metabolic Medicine, Princess Alexandra Hospital, University of Queensland, Brisbane, Queensland, Australia; <sup>8</sup>Dept Epidemiology and Population Health, London School of Hygiene and Tropical Medicine, London WC1E 7HT, UK; <sup>9</sup>Neuropsychiatric Genetics Research Group, Institute of Molecular Medicine, Trinity College Dublin, Dublin 2, Eire; <sup>10</sup>Dept Psychological Medicine, Cardiff University School of Medicine, Heath Park, Cardiff CF14 4XN, UK; <sup>11</sup>Molecular and Physiological Sciences, The Wellcome Trust, London NW1 2BE; <sup>12</sup>Centre for Gastroenterology, Bart's and the London School of Medicine and Dentistry, London E1 2AT, UK; <sup>13</sup>Clinical Neurosciences, St George's University of London, London SW17 0RE; <sup>14</sup>Dept Medical and Molecular Genetics, King's College London School of Medicine, Guy's Hospital, London SE1 9RT, UK; <sup>15</sup>Oxford Centre for Diabetes, Endocrinology and Metabolism (ICDEM), Churchill Hospital, Oxford OX3 7LJ, UK; <sup>16</sup>Biomedical Research Centre, Ninewells Hospital and Medical School, Dundee DD1 9SY, UK; <sup>17</sup>Social, Genetic and Developmental Psychiatry Centre, King's College London Institute of Psychiatry, Denmark Hill, London SE5 8AF, UK; <sup>18</sup>University of Cambridge Dept Clinical Neurosciences, Addenbrooke's Hospital, Cambridge CB2 2QQ, UK; <sup>19</sup>Dept Cardiovascular Science, University of Leicester, Glenfield Hospital, Leicester LE3 9QP; <sup>20</sup>NIHR Biomedical Research Centre for Ophthalmology, Moorfields Eye Hospital NHS Foundation Trust and UCL Institute of Ophthalmology, London EC1V 2PD, UK; <sup>21</sup>Dept Molecular Neuroscience, Institute of Neurology, Queen Square, London WC1N 3BG, UK.

## Subjects

Ascertainment and diagnosis information for groups not previously described is given below. All individuals provided written, informed consent for participation and approval was obtained from ethics committees at each location.

**Belgium.** The sample consisted of 521 patients and 341 controls collected in Leuven, Belgium. Following quality control, 510 patients and 341 controls were included. Of the patients finally included, 397 were diagnosed with schizophrenia and 113 were diagnosed with schizoaffective disorder. Patients were recruited from those in treatment at the University Psychiatric Centre of the Catholic University in Leuven and were diagnosed according to DSM-IV criteria by experienced psychiatrists. The control group consisted of unrelated, healthy Flemish individuals collected at the University Hospital Gasthuisberg in Leuven (1).

**Denmark (Aarhus).** The sample consisted of 909 patients clinically diagnosed with schizophrenia according to International Classification of Diseases, 10th revision (ICD-10) criteria, and 899 controls matched by birth cohort. Following quality-control (QC), there were 878 patients and 874 controls. All individuals were born in Denmark and obtained from the Danish Newborn Screening Biobank ([www.ssi.dk](http://www.ssi.dk)).

**Denmark (Copenhagen).** Additional controls ( $N = 1,045$ ) were derived from the Prospective Epidemiological Risk Factor (PERF study) (2).

**Germany (Göttingen).** The sample consisted of 1,014 patients and 1,144 controls from the Göttingen Research Association for Schizophrenia (GRAS) (3) project. Patients had a confirmed DSM-IV diagnosis of schizophrenia (~82%) or schizoaffective disorder (~18%). Controls were blood donors. The anonymized controls were 2.2% non-Caucasian; cases were proportionally matched for ethnicity.

**Ireland.** The Irish sample is part of the Wellcome Trust Case Control Consortium 2 investigation of common, complex genetic disorders. The case sample used in this study included 1,310 individuals recruited through community mental services and inpatient units in the Republic of Ireland and Northern Ireland. None of the individuals used here were included in the International Schizophrenia Consortium (ISC) genome-wide association (GWA) scan (4). Cases were interviewed by a psychiatrist or psychiatric nurse trained to use a structured clinical interview (Structured Clinical Interview for DSM-IV (SCID-P) (5); Schedule for Affective Disorders and Schizophrenia (Lifetime version; SADS-LB) (6); Schedule for Clinical Assessment in Neuropsychiatry (SCAN) for ICD-10 (7)). Diagnosis of a major psychotic disorder was made by the consensus lifetime best estimate method using DSM-IV criteria with all available information (interview, family or staff report and chart review). All cases were over 18 years of age, had four Irish grandparents and had been screened to exclude substance-induced psychotic disorder or psychosis due to a general medical condition. Cases were identified as meeting either narrow or broad diagnostic criteria. The narrow diagnostic group used here ( $N = 1,310$ ) included Schizophrenia ( $N = 1,089$ ), Schizoaffective Disorder ( $N = 219$ ) and

Schizophreniform Disorder ( $N = 2$ ). Controls ( $N = 1,023$ ), also not included in the ISC GWA study (4), were ascertained from the Irish GeneBank and represented blood donors from the Irish Blood Transfusion Service (IBTS). They met the same ethnicity criteria as cases but were not specifically screened for psychiatric illness. Individuals taking regular prescribed medication are excluded from blood donation in Ireland and donors are not financially remunerated, making it unlikely that patient or socially disadvantaged groups (which might have higher schizophrenia rates) were over-represented among control subjects.

**Italy.** The Italian sample consisted of 148 cases and 94 controls. Following quality control, there were 138 cases and 89 controls. Cases were ascertained as incident patients at the Department of Psychiatry, University of Rome-Tor Vergata. DSM-IV criteria for schizophrenia were verified using SCID-P interviews. Controls were healthy subjects with no history of either psychiatric illness or use of psychoactive medication.

### **Genotyping, quality control and imputation**

**deCODE Genetics and UCLA.** The Netherlands 1 study group and Netherlands 2 controls were genotyped using Illumina genome-wide arrays as previously described (8). Samples were removed if they had yield < 98%, a discrepancy between reported and genotype-inferred sex, evidence of non-European ancestry or identity with a higher-yield sample already included in the study. Markers were excluded if they had case or control yield < 95%, control Hardy-Weinberg equilibrium  $P < 1 \times 10^{-5}$  or a difference in allele frequency between typing centers with  $P < 1 \times 10^{-5}$ .

The Denmark/Aarhus 1, Denmark/Copenhagen, Germany/Bonn, Germany/Munich, Hungary, Italy, Norway, Russia and Sweden study groups, and the Belgium and Netherlands 2 cases, were single-track genotyped using Centaurus assays as previously described (8). Samples with yield < 90% were excluded, and the lower yield of each pair of duplicates was removed. Markers had control Hardy-Weinberg equilibrium  $P$  values > 0.001, and, in each group, yield in cases and controls was > 95%.

**Belgium.** Controls were genotyped and quality control was carried out as previously described (1).

**CATIE.** Individual genotypes were obtained from the NIMH Center for Collaborative Genetic Studies on Mental Disorders. Genotyping was previously described (9). All subjects had genotype yield > 96% and markers had MAF > 0.01, yield > 95% and control HWE  $P$  values >  $1 \times 10^{-6}$ . Individuals without self-reported ancestry only from Europe, discrepancy between reported and genotype-inferred sex, one of each pair of individuals determined by IBD estimation to be first or second degree relatives and outliers in the principal component analysis were removed.

**Denmark/Aarhus 2.** DNA was extracted from dried blood spots provided by the Danish Newborn Screening Biobank using the Extract-N-Amp Blood PCR kit (Sigma Aldrich), and whole-genome-amplification was performed using the RepliG kit (Qiagen) essentially as previously described (10). For each sample, whole-genome-amplification was performed in three separate reactions which were pooled before genotyping.

Samples with yield < 97% were excluded. SNPs included in this study had yield > 98% and Hardy Weinberg equilibrium  $P$  values > 0.05.

**Finland.** Data were subject to standard quality control procedures including: genotyping concordance with Sequenom MassArray for a selected set of SNPs, duplicate sample concordance, sample and SNP success rate thresholds of > 95%, Hardy-Weinberg equilibrium  $P$  values >  $1 \times 10^{-6}$ , removal of heterozygosity outliers and related individuals ( $\pi$ -hat cut off at 0.1).

**Germany (Göttingen).** Genotyping was carried out with SimpleProbes (TIB Molbiol) on a LightCycler480 (Roche). All markers had control Hardy-Weinberg equilibrium  $P$  values > 0.05 and genotyping yield was > 95% in both cases and controls.

**Ireland.** The samples from Ireland passing Affymetrix laboratory QC had their raw intensities renormalized within collections using CelQuantileNorm (see <http://outmodedbonsai.sourceforge.net/>). The normalized intensities were used to call genotypes with an updated version of the Chiamo software (see [www.stats.ox.ac.uk/~marchini/software/gwas/chiamo.html](http://www.stats.ox.ac.uk/~marchini/software/gwas/chiamo.html)) adapted for Affymetrix 6.0 SNP array data. Standard quality control measures were applied as part of the Wellcome Case Control Consortium 2 and have been published elsewhere (11). Briefly, in order to try to obtain the maximally powerful set of samples we calculated summary statistics of each individual's genotypes (heterozygosity, missingness, HapMap principal component scores) and probe intensities (the difference between the A and B channel intensity and the average X chromosomes intensity). Using a Bayesian mixture model we then clustered individuals on the basis of these statistics in order to identify individuals with outlying patterns of diversity. We excluded individuals with greater than 50% probability of assignment to the outlier class. To assess relatedness amongst study individuals we compared each individual with the 100 individuals they were most closely related to (on the basis of genome-wide levels of allele sharing) and used a hidden Markov Model (HMM) to decide, at each position in their genome, whether the two individuals shared 0, 1, or 2 chromosomes identical by descent. We obtained a set of individuals with IBD < 5% by iteratively removing one of each pair of putatively-related individuals. Imputation was carried out using IMPUTE2 (12). Details on the SNP quality control and imputation methodology have been published previously (13).

**Spain.** Genotyping was carried out as described previously (8). Samples had yield > 90% and one of each pair of duplicates was removed. SNPs had yield > 95% in cases and controls and control Hardy-Weinberg  $P$  values > 0.01.

**United Kingdom.** Genotyping and quality control have been described previously (14). Imputation was performed using Mach 1.0 (15) with the 1000 genomes-Sanger 2009-08 data release (<http://www.sph.umich.edu/csg/yli/mach/download/1000G-Sanger-0908.html>) as the reference source. Only SNPs with RSQR > 0.3 were retained. Tests for association were with a likelihood ratio test using mach2dat

(16). Note that imputed data were not available for the 'controls' derived from the 6 sets of non-psychiatric disorder cases reported by the WTCCC.

**Note on potential population stratification**

We controlled for potential population stratification in two ways. For the study groups collected from the United States and Finland (locations with the greatest population structure), association results were adjusted using principal components. For the remaining groups with genome-wide data, genomic control inflation factors were small (1.08, 1.05, 1.09 and 1.08 for the Netherlands 1, Denmark/Aarhus 2, Ireland and the UK, respectively) and were corrected for by using genomic control.

**Table S1a.** Schizophrenia case and control samples: GWAS and meta-analysis

|                               | <i>N</i> cases | <i>N</i> controls | Sample description          | Genotyping platform     | Location of genotyping           |
|-------------------------------|----------------|-------------------|-----------------------------|-------------------------|----------------------------------|
| <b>SGENE-plus GWAS</b>        |                |                   |                             |                         |                                  |
| England                       | 93             | 88                | Stefansson <i>et al</i> (8) | Illumina 300K           | deCODE Genetics                  |
| Finland, excl. Kuusamo        | 59             | 147               | Stefansson <i>et al</i> (8) | Illumina 300K           | deCODE Genetics                  |
| Finland, Kuusamo              | 123            | 50                | Stefansson <i>et al</i> (8) | Illumina 300K           | deCODE Genetics                  |
| Germany, Bonn                 | 483            | 367               | Stefansson <i>et al</i> (8) | Illumina 550K           | University of Bonn               |
| Germany, Munich               | 574            | 604               | Stefansson <i>et al</i> (8) | Illumina 300K           | deCODE Genetics, Duke University |
| Iceland                       | 589            | 11492             | Stefansson <i>et al</i> (8) | Illumina 300K           | deCODE Genetics                  |
| Italy                         | 84             | 89                | Stefansson <i>et al</i> (8) | Illumina 300K           | deCODE Genetics                  |
| Scotland, Aberdeen            | 658            | 661               | Stefansson <i>et al</i> (8) | Illumina 300K/550K      | deCODE Genetics, Duke University |
| Subtotal                      | 2663           | 13498             | -                           | -                       | -                                |
| <b>2009 Collaboration (8)</b> |                |                   |                             |                         |                                  |
| ISC, without Aberdeen         | 2602           | 2885              | Purcell <i>et al</i> (4)    | Affymetrix 500K/5.0/6.0 | Broad Institute                  |
| MGS, European ancestry        | 2681           | 2653              | Shi <i>et al</i> (17)       | Affymetrix 6.0          | Broad Institute                  |
| Subtotal                      | 5283           | 5538              | -                           | -                       | -                                |
| <b>Total</b>                  | <b>7946</b>    | <b>19036</b>      |                             |                         |                                  |

Shown are numbers of cases and controls following sample quality control.



**Table S1b.** Schizophrenia case and control samples: follow-up

|                            | <i>N</i> cases     | <i>N</i> controls | Sample description                                    | Genotyping platform      | Location of genotyping                  |
|----------------------------|--------------------|-------------------|-------------------------------------------------------|--------------------------|-----------------------------------------|
| <b>Primary follow-up</b>   |                    |                   |                                                       |                          |                                         |
| Belgium                    | 510 (113)          | 341               | this work                                             | Centaurus/Illumina 370K  | deCODE Genetics                         |
| CATIE                      | 391                | 404               | Sullivan <i>et al</i> (9)                             | Affymetrix 500K, 164K    | Perlegen                                |
| Denmark, Aarhus 1          | 227                | 493               | Stefansson <i>et al</i> (8)                           | Centaurus                | deCODE Genetics                         |
| Denmark, Aarhus 2          | 878                | 874               | this work                                             | Illumina 610K            | AROS A/S, Aarhus University             |
| Denmark, Copenhagen        | 1324 (136)         | 2350              | Stefansson <i>et al</i> (8) ( <i>expanded</i> ), t.w. | Centaurus                | deCODE Genetics                         |
| Finland, excl. Kuusamo     | 287                | 3873              | Stefansson <i>et al</i> (8)                           | Illumina 660K/370K       | Sanger Institute, Broad Institute       |
| Germany, Bonn              | 607                | 1534              | Stefansson <i>et al</i> (8)                           | Centaurus                | deCODE Genetics                         |
| Germany, Munich            | 303                | 1614              | Stefansson <i>et al</i> (8)                           | Centaurus                | deCODE Genetics                         |
| Hungary                    | 241                | 214               | Stefansson <i>et al</i> (8)                           | Centaurus                | deCODE Genetics                         |
| Ireland                    | 1310 (219)         | 1023              | this work                                             | Affymetrix 6.0           | Affymetrix, Sanger Institute            |
| Italy                      | 138                | 89                | this work                                             | Centaurus                | deCODE Genetics                         |
| Netherlands 1              | 693                | 3689              | Stefansson <i>et al</i> (8)                           | Illumina 370K/550K       | deCODE Genetics, UCLA                   |
| Netherlands 2              | 176                | 603               | Stefansson <i>et al</i> (8) ( <i>expanded</i> )       | Centaurus/Illumina 370K  | deCODE Genetics                         |
| Norway                     | 228 (40)           | 293               | Stefansson <i>et al</i> (8) ( <i>expanded</i> )       | Centaurus                | deCODE Genetics                         |
| Russia                     | 597 (28)           | 742               | Stefansson <i>et al</i> (8) ( <i>expanded</i> )       | Centaurus                | deCODE Genetics                         |
| Spain, Santiago            | 282                | 598               | Stefansson <i>et al</i> (8)                           | Sequenom MassArray iPlex | Spanish National Genotyping Center      |
| Spain, Valencia            | 323                | 398               | Stefansson <i>et al</i> (8)                           | Sequenom MassArray iPlex | Spanish National Genotyping Center      |
| Sweden                     | 252                | 287               | Stefansson <i>et al</i> (8)                           | Centaurus                | deCODE Genetics                         |
| United Kingdom             | 479                | 2937              | O'Donovan <i>et al</i> (14)                           | Affymetrix 500K          | WTCCC Center                            |
| Subtotal                   | 9246 (536)         | 22356             | -                                                     | -                        | -                                       |
| <b>Secondary follow-up</b> |                    |                   |                                                       |                          |                                         |
| GRAS                       | 1014 (180)         | 1144              | this work                                             | Roche LightCycler480     | MPI of Experimental Medicine, Göttingen |
| <b>Total</b>               | <b>10260 (716)</b> | <b>23500</b>      |                                                       |                          |                                         |

Shown are numbers of cases and controls following sample quality control. For cases, the number of the total diagnosed with schizoaffective disorder (or persistent delusional disorder in the case of the Denmark, Copenhagen study) is given in parentheses. t.w, this work; UCLA, University of California at Los Angeles; WTCCC, Wellcome Trust Case Control Consortium; MPI, Max Planck Institute

**Table S2.** Association results in the previous schizophrenia meta-analysis (SGENE-plus+ISC+MGS), the primary follow-up set and the combined (discovery + primary follow-up) data set

| Chr | Mb    | SNP        | AI | Freq  | SGENE-plus + ISC + MGS<br>(7,946 cases; 19,036 controls) |                        | primary follow-up<br>(9,246 cases; 22,356 controls) |                        | SGENE-plus + ISC + MGS + primary follow-up<br>(17,192 cases; 41,392 controls) |                         | Close Genes             |
|-----|-------|------------|----|-------|----------------------------------------------------------|------------------------|-----------------------------------------------------|------------------------|-------------------------------------------------------------------------------|-------------------------|-------------------------|
|     |       |            |    |       | OR                                                       | P value                | OR                                                  | P value                | OR                                                                            | P value                 |                         |
| 6   | 28.4  | rs13211507 | T  | 0.92  | 1.22                                                     | 5.2 x 10 <sup>-6</sup> | 1.21                                                | 1.1 x 10 <sup>-7</sup> | 1.21                                                                          | 3.1 x 10 <sup>-12</sup> | <i>PGBD1</i>            |
| 6   | 27.4  | rs6932590  | T  | 0.78  | 1.15                                                     | 5.6 x 10 <sup>-7</sup> | 1.10                                                | 6.9 x 10 <sup>-5</sup> | 1.12                                                                          | 4.6 x 10 <sup>-10</sup> | <i>PRSS16, FKSG83</i>   |
| 6   | 32.3  | rs3131296  | G  | 0.87  | 1.18                                                     | 9.8 x 10 <sup>-6</sup> | 1.14                                                | 1.4 x 10 <sup>-5</sup> | 1.15                                                                          | 9.8 x 10 <sup>-10</sup> | <i>NOTCH4</i>           |
| 6   | 27.2  | rs6913660  | C  | 0.85  | 1.19                                                     | 4.6 x 10 <sup>-8</sup> | 1.09                                                | 0.00067                | 1.13                                                                          | 1.2 x 10 <sup>-9</sup>  | <i>-, HIST1H2BJ</i>     |
| 18  | 51.3  | rs9960767  | C  | 0.056 | 1.27                                                     | 1.8 x 10 <sup>-6</sup> | 1.16                                                | 0.00025                | 1.20                                                                          | 4.2 x 10 <sup>-9</sup>  | <i>TCF4</i>             |
| 2   | 58.1  | rs2312147  | C  | 0.61  | 1.11                                                     | 3.7 x 10 <sup>-6</sup> | 1.08                                                | 0.00024                | 1.09                                                                          | 6.2 x 10 <sup>-9</sup>  | <i>-, VRK2</i>          |
| 18  | 50.9  | rs4309482  | A  | 0.58  | 1.10                                                     | 7.1 x 10 <sup>-5</sup> | 1.08                                                | 3.6 x 10 <sup>-5</sup> | 1.09                                                                          | 1.1 x 10 <sup>-8</sup>  | <i>CCDC68, TCF4</i>     |
| 11  | 124.1 | rs12807809 | T  | 0.83  | 1.16                                                     | 2.3 x 10 <sup>-6</sup> | 1.09                                                | 0.00057                | 1.12                                                                          | 1.5 x 10 <sup>-8</sup>  | <i>SPA17, NRG1</i>      |
| 5   | 101.9 | rs1502844  | C  | 0.30  | 1.11                                                     | 3.8 x 10 <sup>-6</sup> | 1.06                                                | 0.0027                 | 1.08                                                                          | 1.3 x 10 <sup>-7</sup>  | <i>SLCO6A1, -</i>       |
| 8   | 89.3  | rs6994019  | T  | 0.25  | 1.12                                                     | 1.0 x 10 <sup>-5</sup> | 1.07                                                | 0.0017                 | 1.09                                                                          | 1.7 x 10 <sup>-7</sup>  | <i>MMP16</i>            |
| 11  | 112.9 | rs6589386  | C  | 0.61  | 1.10                                                     | 1.3 x 10 <sup>-5</sup> | 1.06                                                | 0.0026                 | 1.08                                                                          | 2.7 x 10 <sup>-7</sup>  | <i>DRD2, TMPRSS5</i>    |
| 10  | 104.7 | rs1046778  | T  | 0.67  | 1.11                                                     | 4.5 x 10 <sup>-5</sup> | 1.07                                                | 0.0020                 | 1.08                                                                          | 6.0 x 10 <sup>-7</sup>  | <i>AS3MT</i>            |
| 2   | 144.9 | rs12991836 | C  | 0.37  | 1.11                                                     | 3.8 x 10 <sup>-5</sup> | 1.06                                                | 0.0031                 | 1.08                                                                          | 1.1 x 10 <sup>-6</sup>  | <i>GTDC1, ZEB2</i>      |
| 16  | 29.9  | rs4583255  | T  | 0.56  | 1.10                                                     | 2.5 x 10 <sup>-5</sup> | 1.05                                                | 0.0072                 | 1.07                                                                          | 1.9 x 10 <sup>-6</sup>  | <i>TAOK2</i>            |
| 6   | 43.3  | rs2273709  | A  | 0.81  | 1.13                                                     | 4.1 x 10 <sup>-5</sup> | 1.07                                                | 0.0068                 | 1.09                                                                          | 2.6 x 10 <sup>-6</sup>  | <i>PARC</i>             |
| 11  | 30.3  | rs1765142  | A  | 0.64  | 1.12                                                     | 1.4 x 10 <sup>-5</sup> | 1.05                                                | 0.016                  | 1.08                                                                          | 4.2 x 10 <sup>-6</sup>  | <i>C11orf46, MPPED2</i> |
| 5   | 76.2  | rs2460508  | G  | 0.45  | 1.10                                                     | 9.2 x 10 <sup>-5</sup> | 1.05                                                | 0.012                  | 1.07                                                                          | 1.1 x 10 <sup>-5</sup>  | <i>S100Z</i>            |
| 6   | 73.2  | rs2789588  | T  | 0.68  | 1.10                                                     | 4.7 x 10 <sup>-5</sup> | 1.05                                                | 0.026                  | 1.07                                                                          | 1.6 x 10 <sup>-5</sup>  | <i>RIMS1, KCNQ5</i>     |
| 9   | 120.4 | rs1572299  | A  | 0.49  | 1.12                                                     | 3.1 x 10 <sup>-6</sup> | 1.04                                                | 0.071                  | 1.07                                                                          | 1.7 x 10 <sup>-5</sup>  | -                       |
| 16  | 4.5   | rs3747600  | A  | 0.28  | 1.12                                                     | 3.2 x 10 <sup>-6</sup> | 1.03                                                | 0.11                   | 1.07                                                                          | 2.3 x 10 <sup>-5</sup>  | <i>C16orf5</i>          |
| 5   | 113.5 | rs1487222  | A  | 0.41  | 1.11                                                     | 7.3 x 10 <sup>-6</sup> | 1.03                                                | 0.095                  | 1.07                                                                          | 2.6 x 10 <sup>-5</sup>  | -                       |
| 6   | 32.4  | rs2076537  | C  | 0.59  | 1.14                                                     | 5.5 x 10 <sup>-5</sup> | 1.05                                                | 0.015                  | 1.07                                                                          | 2.6 x 10 <sup>-5</sup>  | <i>C6orf10</i>          |
| 1   | 53.5  | rs5174     | G  | 0.57  | 1.09                                                     | 8.2 x 10 <sup>-5</sup> | 1.04                                                | 0.039                  | 1.06                                                                          | 3.4 x 10 <sup>-5</sup>  | <i>LRP8</i>             |
| 9   | 26.9  | rs7863476  | A  | 0.19  | 1.16                                                     | 6.3 x 10 <sup>-7</sup> | 1.03                                                | 0.24                   | 1.08                                                                          | 4.0 x 10 <sup>-5</sup>  | <i>PLAA</i>             |
| 3   | 162.9 | rs2063836  | T  | 0.61  | 1.10                                                     | 4.7 x 10 <sup>-5</sup> | 1.04                                                | 0.060                  | 1.06                                                                          | 4.5 x 10 <sup>-5</sup>  | -                       |
| 3   | 182.2 | rs1010471  | G  | 0.65  | 1.12                                                     | 3.2 x 10 <sup>-6</sup> | 1.03                                                | 0.17                   | 1.06                                                                          | 5.0 x 10 <sup>-5</sup>  | <i>FXR1</i>             |

**Table S2 (cont).** Association results in the previous schizophrenia meta-analysis (SGENE-plus+ISC+MGS), the primary follow-up set and the combined (discovery + primary follow-up) data set

| Chr | Mb    | SNP        | Al | Freq  | SGENE-plus + ISC + MGS<br>(7,946 cases; 19,036 controls) |                        | primary follow-up<br>(9,246 cases; 22,356 controls) |                | SGENE-plus + ISC + MGS + primary follow-up<br>(17,192 cases; 41,392 controls) |                        | Close Genes          |
|-----|-------|------------|----|-------|----------------------------------------------------------|------------------------|-----------------------------------------------------|----------------|-------------------------------------------------------------------------------|------------------------|----------------------|
|     |       |            |    |       | OR                                                       | <i>P</i> value         | OR                                                  | <i>P</i> value | OR                                                                            | <i>P</i> value         |                      |
| 5   | 11.9  | rs4466166  | T  | 0.012 | 1.57                                                     | 3.9 x 10 <sup>-5</sup> | 1.17                                                | 0.054          | 1.29                                                                          | 8.9 x 10 <sup>-5</sup> | <i>CTNND2</i>        |
| 4   | 72.3  | rs2579309  | A  | 0.054 | 1.22                                                     | 2.5 x 10 <sup>-5</sup> | 1.05                                                | 0.20           | 1.12                                                                          | 0.00023                | <i>SLC4A4</i>        |
| 7   | 110.9 | rs38752    | T  | 0.62  | 1.11                                                     | 4.6 x 10 <sup>-5</sup> | 1.03                                                | 0.20           | 1.06                                                                          | 0.00029                | <i>IMMP2L</i>        |
| 11  | 55.3  | rs11230864 | T  | 0.37  | 1.10                                                     | 3.9 x 10 <sup>-5</sup> | 1.02                                                | 0.29           | 1.05                                                                          | 0.00053                | <i>OR4C6, OR5D13</i> |
| 12  | 1.5   | rs3741976  | G  | 0.36  | 1.10                                                     | 8.8 x 10 <sup>-5</sup> | 1.02                                                | 0.28           | 1.06                                                                          | 0.00082                | <i>ERC1</i>          |
| 6   | 64.3  | rs1744163  | C  | 0.90  | 1.19                                                     | 6.9 x 10 <sup>-5</sup> | 1.03                                                | 0.43           | 1.09                                                                          | 0.0023                 | <i>PTP4A1</i>        |
| 6   | 31.2  | rs3815087  | T  | 0.19  | 1.12                                                     | 6.7 x 10 <sup>-5</sup> | 1.01                                                | 0.58           | 1.06                                                                          | 0.0030                 | <i>PSORS1C1</i>      |
| 22  | 18.3  | rs7289747  | C  | 0.063 | 1.22                                                     | 9.6 x 10 <sup>-6</sup> | 1.01                                                | 0.89           | 1.09                                                                          | 0.0032                 | <i>TXNRD2</i>        |
| X   | 6.0   | rs6639583  | T  | 0.24  | 1.12                                                     | 8.6 x 10 <sup>-5</sup> | 1.01                                                | 0.73           | 1.06                                                                          | 0.019                  | <i>NLGN4X</i>        |
| 22  | 46.9  | rs131137   | A  | 0.57  | 1.11                                                     | 9.3 x 10 <sup>-5</sup> | 1.00                                                | 0.99           | 1.04                                                                          | 0.021                  | -                    |
| 3   | 175.2 | rs13078193 | G  | 0.24  | 1.12                                                     | 2.2 x 10 <sup>-5</sup> | 0.99                                                | 0.56           | 1.04                                                                          | 0.027                  | <i>NLGN1</i>         |
| 22  | 26.1  | rs5752534  | C  | 0.73  | 1.11                                                     | 5.6 x 10 <sup>-5</sup> | 0.97                                                | 0.26           | 1.03                                                                          | 0.058                  | -                    |
| 12  | 74.3  | rs1383098  | C  | 0.21  | 1.11                                                     | 9.7 x 10 <sup>-5</sup> | 0.97                                                | 0.15           | 1.03                                                                          | 0.14                   | <i>KRR1,-</i>        |

Mb, megabases based on NCBI Build 36; Al, allele; Freq, average control frequency in the SGENE-plus genome-wide typed data; Close genes, the RefSeq gene a SNP is located in or, if the SNP is not located in a gene, the closest RefSeq genes within 200 kb to either side.

**Table S3.** Association of rs2312147[C] with schizophrenia by study group

| Study Group                 | N cases | N con | Freq  | OR (95% CI)      | P value |
|-----------------------------|---------|-------|-------|------------------|---------|
| <b>SGENE-plus</b>           |         |       |       |                  |         |
| England                     | 93      | 88    | 0.568 | 1.38 (0.90,2.11) | 0.13    |
| Finland,excl Kuusamo        | 59      | 147   | 0.619 | 1.40 (0.88,2.22) | 0.15    |
| Finland, Kuusamo            | 123     | 50    | 0.660 | 0.88 (0.53,1.46) | 0.61    |
| Germany, Bonn               | 483     | 367   | 0.583 | 1.29 (1.06,1.58) | 0.013   |
| Germany, Munich             | 574     | 604   | 0.607 | 1.07 (0.91,1.27) | 0.41    |
| Iceland                     | 589     | 11492 | 0.653 | 1.18 (1.03,1.35) | 0.021   |
| Italy                       | 84      | 89    | 0.556 | 1.73 (1.11,2.70) | 0.016   |
| Scotland                    | 658     | 661   | 0.622 | 1.07 (0.90,1.26) | 0.44    |
| <b>2009 Collaboration</b>   |         |       |       |                  |         |
| ISC <sup>1</sup>            | NA      | NA    | NA    | 1.09 (1.00,1.18) | 0.043   |
| MGS <sup>2</sup>            | NA      | NA    | NA    | 1.09 (1.01,1.18) | 0.035   |
| <b>Primary Follow-up</b>    |         |       |       |                  |         |
| Belgium                     | 506     | 340   | 0.600 | 1.20 (0.98,1.47) | 0.072   |
| CATIE <sup>3</sup>          | 380     | 392   | 0.591 | 1.06 (0.85,1.32) | 0.62    |
| Denmark, Aarhus 1           | 226     | 474   | 0.636 | 1.01 (0.80,1.28) | 0.90    |
| Denmark, Aarhus 2           | 877     | 871   | 0.602 | 1.07 (0.93,1.23) | 0.37    |
| Denmark, Copenhagen         | 1300    | 2338  | 0.615 | 1.07 (0.97,1.18) | 0.19    |
| Finland, excl. Kuusamo      | 287     | 3873  | 0.631 | 1.02 (0.85,1.24) | 0.81    |
| Germany, Bonn               | 603     | 1526  | 0.613 | 1.03 (0.90,1.19) | 0.63    |
| Germany, Munich             | 300     | 1602  | 0.608 | 0.93 (0.78,1.11) | 0.42    |
| Hungary                     | 239     | 214   | 0.596 | 1.07 (0.82,1.39) | 0.64    |
| Ireland <sup>2</sup>        | 1310    | 1023  | 0.623 | 1.12 (0.99,1.27) | 0.076   |
| Italy                       | 137     | 89    | 0.618 | 1.04 (0.71,1.54) | 0.83    |
| Netherlands 1               | 692     | 3684  | 0.610 | 1.12 (0.99,1.26) | 0.083   |
| Netherlands 2               | 176     | 603   | 0.623 | 1.11 (0.87,1.43) | 0.39    |
| Norway                      | 225     | 280   | 0.662 | 0.90 (0.69,1.16) | 0.41    |
| Russia                      | 595     | 737   | 0.577 | 1.15 (0.98,1.34) | 0.079   |
| Spain, Santiago             | 282     | 597   | 0.654 | 1.20 (0.96,1.48) | 0.10    |
| Spain, Valencia             | 320     | 397   | 0.657 | 0.97 (0.78,1.20) | 0.77    |
| Sweden                      | 251     | 287   | 0.622 | 1.08 (0.84,1.38) | 0.55    |
| United Kingdom <sup>2</sup> | 479     | 2937  | NA    | 1.14 (0.98,1.32) | 0.083   |
| <b>Secondary Follow-up</b>  |         |       |       |                  |         |
| GRAS                        | 993     | 1141  | 0.600 | 1.10 (0.97,1.24) | 0.13    |

Freq, control frequency <sup>1</sup>rs2678910 (HapMap CEU  $r^2=0.967$ ) <sup>2</sup>imputed <sup>3</sup>rs1518395 (HapMap CEU  $r^2=0.967$ )

**Table S4.** Association of rs4309482[A] with schizophrenia by study group

| Study Group                 | <i>N</i> cases | <i>N</i> con | Freq  | OR (95% CI)      | <i>P</i> value |
|-----------------------------|----------------|--------------|-------|------------------|----------------|
| <b>SGENE-plus</b>           |                |              |       |                  |                |
| England                     | 93             | 88           | 0.602 | 1.07 (0.70,1.63) | 0.76           |
| Finland, excl Kuusamo       | 58             | 147          | 0.497 | 1.12 (0.73,1.74) | 0.60           |
| Finland, Kuusamo            | 123            | 50           | 0.530 | 1.54 (0.94,2.51) | 0.086          |
| Germany, Bonn               | 483            | 367          | 0.601 | 1.15 (0.94,1.41) | 0.18           |
| Germany, Munich             | 574            | 602          | 0.578 | 1.23 (1.04,1.46) | 0.015          |
| Iceland                     | 589            | 11483        | 0.586 | 1.08 (0.95,1.23) | 0.26           |
| Italy                       | 84             | 88           | 0.682 | 0.72 (0.46,1.13) | 0.15           |
| Scotland                    | 658            | 661          | 0.568 | 1.19 (1.01,1.39) | 0.039          |
| <b>2009 Collaboration</b>   |                |              |       |                  |                |
| ISC <sup>1</sup>            | NA             | NA           | NA    | 1.05 (0.97,1.14) | 0.24           |
| MGS <sup>2</sup>            | NA             | NA           | NA    | 1.10 (1.01,1.19) | 0.022          |
| <b>Primary follow-up</b>    |                |              |       |                  |                |
| Belgium                     | 507            | 340          | 0.591 | 0.96 (0.79,1.17) | 0.70           |
| CATIE <sup>1</sup>          | 384            | 394          | 0.574 | 1.10 (0.88,1.37) | 0.40           |
| Denmark, Aarhus 1           | 223            | 476          | 0.576 | 1.08 (0.86,1.36) | 0.51           |
| Denmark, Aarhus 2           | 878            | 872          | 0.562 | 1.22 (1.06,1.40) | 0.0045         |
| Denmark, Copenhagen         | 1276           | 2258         | 0.582 | 1.06 (0.96,1.17) | 0.24           |
| Finland, excl. Kuusamo      | 287            | 3863         | 0.556 | 1.08 (0.90,1.29) | 0.39           |
| Germany, Bonn               | 591            | 1510         | 0.610 | 0.95 (0.82,1.08) | 0.42           |
| Germany, Munich             | 290            | 1556         | 0.578 | 1.24 (1.03,1.49) | 0.02           |
| Hungary                     | 232            | 211          | 0.628 | 1.02 (0.77,1.33) | 0.91           |
| Ireland <sup>2</sup>        | 1310           | 1023         | 0.582 | 1.08 (0.96,1.22) | 0.21           |
| Italy                       | 137            | 89           | 0.567 | 1.33 (0.90,1.95) | 0.15           |
| Netherlands 1               | 693            | 3675         | 0.571 | 1.15 (1.02,1.30) | 0.025          |
| Netherlands 2               | 174            | 603          | 0.575 | 1.14 (0.89,1.45) | 0.30           |
| Norway                      | 225            | 282          | 0.567 | 1.06 (0.83,1.37) | 0.63           |
| Russia                      | 589            | 733          | 0.583 | 1.13 (0.97,1.32) | 0.12           |
| Spain, Santiago             | 281            | 595          | 0.601 | 0.98 (0.80,1.20) | 0.85           |
| Spain, Valencia             | 322            | 398          | 0.652 | 1.03 (0.83,1.28) | 0.80           |
| Sweden                      | 251            | 284          | 0.570 | 1.04 (0.81,1.32) | 0.76           |
| United Kingdom <sup>2</sup> | 479            | 2937         | NA    | 1.09 (0.94,1.26) | 0.25           |
| <b>Secondary follow-up</b>  |                |              |       |                  |                |
| GRAS                        | 991            | 1141         | 0.592 | 1.06 (0.94,1.20) | 0.34           |

Freq, control frequency <sup>1</sup>rs4131791 (HapMap CEU  $r^2=1.0$ ) <sup>2</sup>imputed

**Table S5.** Association of rs13211507[T] with schizophrenia by study group

| Study Group                 | <i>N</i> cases | <i>N</i> con | Freq  | OR (95% CI)      | <i>P</i> value |
|-----------------------------|----------------|--------------|-------|------------------|----------------|
| <b>SGENE-plus</b>           |                |              |       |                  |                |
| England                     | 93             | 88           | 0.898 | 1.30 (0.63,2.67) | 0.48           |
| Finland, excl Kuusamo       | 59             | 147          | 0.959 | 1.63 (0.47,5.69) | 0.44           |
| Finland, Kuusamo            | 123            | 50           | 0.960 | 2.01 (0.48,8.32) | 0.34           |
| Germany, Bonn               | 483            | 367          | 0.909 | 1.33 (0.92,1.91) | 0.13           |
| Germany, Munich             | 574            | 604          | 0.917 | 1.41 (1.02,1.95) | 0.036          |
| Iceland                     | 589            | 11492        | 0.932 | 1.02 (0.79,1.32) | 0.86           |
| Italy                       | 84             | 89           | 0.944 | 1.94 (0.66,5.74) | 0.23           |
| Scotland                    | 658            | 661          | 0.870 | 1.24 (0.97,1.58) | 0.091          |
| <b>2009 Collaboration</b>   |                |              |       |                  |                |
| ISC <sup>1</sup>            | NA             | NA           | NA    | 1.39 (1.17,1.66) | 0.00026        |
| MGS <sup>2</sup>            | NA             | NA           | NA    | 1.11 (0.97,1.27) | 0.13           |
| <b>Primary follow-up</b>    |                |              |       |                  |                |
| Belgium                     | 505            | 341          | 0.915 | 1.37 (0.95,1.99) | 0.093          |
| CATIE <sup>3</sup>          | 386            | 400          | 0.910 | 1.19 (0.81,1.74) | 0.39           |
| Denmark, Aarhus 1           | 223            | 484          | 0.892 | 1.23 (0.85,1.80) | 0.27           |
| Denmark, Aarhus 2           | 878            | 874          | 0.911 | 0.97 (0.77,1.23) | 0.81           |
| Denmark, Copenhagen         | 1310           | 2327         | 0.899 | 1.27 (1.07,1.50) | 0.0053         |
| Finland, excl. Kuusamo      | 287            | 3872         | 0.966 | 1.33 (0.68,2.62) | 0.41           |
| Germany, Bonn               | 597            | 1522         | 0.913 | 1.26 (0.98,1.62) | 0.071          |
| Germany, Munich             | 302            | 1604         | 0.919 | 1.89 (1.30,2.76) | 0.00088        |
| Hungary                     | 239            | 213          | 0.939 | 1.35 (0.75,2.41) | 0.32           |
| Ireland <sup>2</sup>        | 1310           | 1023         | 0.898 | 1.24 (1.00,1.55) | 0.048          |
| Italy                       | 138            | 89           | 0.972 | 0.97 (0.31,3.00) | 0.96           |
| Netherlands 1               | 693            | 3689         | 0.896 | 1.13 (0.93,1.39) | 0.23           |
| Netherlands 2               | 175            | 603          | 0.883 | 1.97 (1.28,3.05) | 0.0022         |
| Norway                      | 226            | 286          | 0.911 | 1.38 (0.87,2.19) | 0.18           |
| Russia                      | 593            | 736          | 0.957 | 1.16 (0.78,1.72) | 0.46           |
| Spain, Santiago             | 282            | 597          | 0.955 | 0.87 (0.55,1.39) | 0.57           |
| Spain, Valencia             | 323            | 398          | 0.969 | 0.96 (0.53,1.74) | 0.91           |
| Sweden                      | 249            | 283          | 0.935 | 1.59 (0.92,2.73) | 0.094          |
| United Kingdom <sup>2</sup> | 479            | 2937         | NA    | 1.04 (0.83,1.30) | 0.73           |
| <b>Secondary follow-up</b>  |                |              |       |                  |                |
| GRAS                        | 991            | 1141         | 0.906 | 1.34 (1.08,1.67) | 0.0089         |

Freq, control frequency <sup>1</sup>rs13214023 (HapMap CEU  $r^2=0.915$ ) <sup>2</sup>imputed <sup>3</sup>rs10484399 (HapMap CEU  $r^2=1.0$ )

**Table S6.** Association of rs3131296[G] with schizophrenia by study group

| Study Group                 | <i>N</i> cases | <i>N</i> con | Freq  | OR (95% CI)      | <i>P</i> value |
|-----------------------------|----------------|--------------|-------|------------------|----------------|
| <b>SGENE-plus</b>           |                |              |       |                  |                |
| England                     | 92             | 88           | 0.841 | 1.26 (0.70,2.28) | 0.44           |
| Finland, excl Kuusamo       | 59             | 147          | 0.854 | 2.72 (1.26,5.85) | 0.011          |
| Finland, Kuusamo            | 123            | 50           | 0.910 | 1.64 (0.65,4.13) | 0.30           |
| Germany, Bonn               | 481            | 367          | 0.860 | 1.30 (0.97,1.76) | 0.080          |
| Germany, Munich             | 574            | 604          | 0.877 | 1.03 (0.80,1.33) | 0.82           |
| Iceland                     | 589            | 11489        | 0.913 | 0.98 (0.78,1.23) | 0.85           |
| Italy                       | 84             | 89           | 0.904 | 0.88 (0.43,1.79) | 0.72           |
| Scotland                    | 658            | 661          | 0.806 | 1.48 (1.20,1.84) | 0.00031        |
| <b>2009 Collaboration</b>   |                |              |       |                  |                |
| ISC <sup>1</sup>            | NA             | NA           | NA    | 1.31 (1.11,1.54) | 0.0013         |
| MGS <sup>2</sup>            | NA             | NA           | NA    | 1.09 (0.97,1.22) | 0.14           |
| <b>Primary follow-up</b>    |                |              |       |                  |                |
| Belgium                     | 503            | 339          | 0.888 | 1.09 (0.80,1.50) | 0.57           |
| CATIE <sup>1</sup>          | 390            | 402          | 0.884 | 1.19 (0.84,1.68) | 0.34           |
| Denmark, Aarhus 1           | 227            | 489          | 0.863 | 1.08 (0.78,1.51) | 0.63           |
| Denmark, Aarhus 2           | 873            | 871          | 0.874 | 0.99 (0.81,1.22) | 0.94           |
| Denmark, Copenhagen         | 1322           | 2321         | 0.862 | 1.17 (1.02,1.35) | 0.028          |
| Finland, excl. Kuusamo      | 287            | 3854         | 0.896 | 1.45 (0.98,2.15) | 0.067          |
| Germany, Bonn               | 603            | 1520         | 0.875 | 1.05 (0.85,1.28) | 0.67           |
| Germany, Munich             | 301            | 1604         | 0.870 | 1.43 (1.08,1.89) | 0.013          |
| Hungary                     | 241            | 212          | 0.882 | 1.30 (0.85,1.99) | 0.23           |
| Ireland <sup>2</sup>        | 1310           | 1023         | 0.853 | 1.20 (1.00,1.45) | 0.046          |
| Italy                       | 136            | 89           | 0.888 | 1.59 (0.83,3.06) | 0.16           |
| Netherlands 1               | 690            | 3657         | 0.860 | 1.14 (0.95,1.36) | 0.15           |
| Netherlands 2               | 175            | 598          | 0.851 | 1.22 (0.86,1.72) | 0.27           |
| Norway                      | 226            | 291          | 0.880 | 0.91 (0.63,1.32) | 0.62           |
| Russia                      | 595            | 735          | 0.891 | 1.28 (0.99,1.65) | 0.065          |
| Spain, Santiago             | 282            | 598          | 0.904 | 1.05 (0.74,1.48) | 0.79           |
| Spain, Valencia             | 322            | 398          | 0.898 | 1.29 (0.90,1.85) | 0.17           |
| Sweden                      | 251            | 284          | 0.849 | 1.37 (0.96,1.95) | 0.085          |
| United Kingdom <sup>2</sup> | 479            | 2937         | NA    | 0.92 (0.76,1.12) | 0.41           |
| <b>Secondary follow-up</b>  |                |              |       |                  |                |
| GRAS                        | 993            | 1141         | 0.865 | 1.28 (1.07,1.54) | 0.0080         |

Freq, control frequency <sup>1</sup>rs1150753 (HapMap CEU  $r^2=0.94$ ) <sup>2</sup>imputed

**Table S7.** Association of rs12807809[T] with schizophrenia by study group

| Study Group                 | <i>N</i> cases | <i>N</i> con | Freq  | OR (95% CI)       | <i>P</i> value |
|-----------------------------|----------------|--------------|-------|-------------------|----------------|
| <b>SGENE-plus</b>           |                |              |       |                   |                |
| England                     | 93             | 88           | 0.835 | 0.91 (1.58,0.53)  | 0.75           |
| Finland/Helsinki            | 59             | 147          | 0.854 | 1.02 (0.55,1.88)  | 0.96           |
| Finland/Kuusamo             | 123            | 50           | 0.820 | 1.28 (0.67,2.46)  | 0.46           |
| Germany/Bonn                | 483            | 367          | 0.804 | 1.13 (0.88,1.46)  | 0.33           |
| Germany/Munich              | 574            | 604          | 0.814 | 1.15 (0.93,1.43)  | 0.20           |
| Iceland                     | 589            | 11491        | 0.813 | 1.30 (1.09,1.55)  | 0.0030         |
| Italy                       | 83             | 89           | 0.860 | 1.13 (0.60,2.13)  | 0.71           |
| Scotland                    | 658            | 661          | 0.826 | 1.19 (0.96,1.48)  | 0.12           |
| <b>2009 Collaboration</b>   |                |              |       |                   |                |
| ISC                         | NA             | NA           | NA    | 1.14 (1.00,1.30)  | 0.057          |
| MGS                         | NA             | NA           | NA    | 1.15 (1.03,1.27)  | 0.0092         |
| <b>Primary follow-up</b>    |                |              |       |                   |                |
| Belgium                     | 509            | 340          | 0.824 | 1.15 (0.89,1.49)  | 0.30           |
| CATIE <sup>1</sup>          | 386            | 404          | 0.816 | 1.24 (0.93,1.65)  | 0.14           |
| Denmark, Aarhus 1           | 225            | 487          | 0.803 | 1.27 (0.95,1.70)  | 0.11           |
| Denmark, Aarhus 2           | 878            | 871          | 0.825 | 0.92 (0.77,1.10)  | 0.36           |
| Denmark, Copenhagen         | 1316           | 2339         | 0.817 | 1.03 (0.91,1.17)  | 0.60           |
| Finland, excl. Kuusamo      | 287            | 3871         | 0.827 | 1.23 (0.96,1.59)  | 0.10           |
| Germany, Bonn               | 601            | 1529         | 0.814 | 1.09 (0.92,1.30)  | 0.33           |
| Germany, Munich             | 302            | 1609         | 0.831 | 1.31 (1.03,1.68)  | 0.03           |
| Hungary                     | 237            | 214          | 0.848 | 1.07 (0.74,1.55)  | 0.72           |
| Ireland                     | 1310           | 1023         | 0.830 | 1.02 (0.87,1.20)  | 0.83           |
| Italy                       | 138            | 89           | 0.815 | 1.52 (0.90, 2.55) | 0.11           |
| Netherlands 1               | 693            | 3687         | 0.818 | 1.10 (0.94,1.29)  | 0.23           |
| Netherlands 2               | 176            | 603          | 0.818 | 0.96 (0.71,1.31)  | 0.80           |
| Norway                      | 226            | 289          | 0.825 | 1.24 (0.88,1.73)  | 0.21           |
| Russia                      | 592            | 738          | 0.846 | 1.05 (0.85,1.29)  | 0.68           |
| Spain, Santiago             | 282            | 598          | 0.839 | 1.29 (0.97,1.72)  | 0.077          |
| Spain, Valencia             | 322            | 397          | 0.821 | 1.21 (0.92,1.61)  | 0.18           |
| Sweden                      | 252            | 285          | 0.798 | 1.34 (0.98,1.83)  | 0.067          |
| United Kingdom <sup>2</sup> | 479            | 2937         | NA    | 0.97 (0.77,1.21)  | 0.77           |
| <b>Secondary follow-up</b>  |                |              |       |                   |                |
| GRAS                        | 989            | 1141         | 0.818 | 1.16 (0.99,1.37)  | 0.063          |

Freq, control frequency <sup>1</sup>rs1939214 (HapMap CEU  $r^2=0.943$ ) <sup>2</sup>imputed



**Table S8.** Association of rs9960767[C] with schizophrenia by study group

| Study Group                 | <i>N</i> cases | <i>N</i> con | Freq  | OR (95% CI)      | <i>P</i> value |
|-----------------------------|----------------|--------------|-------|------------------|----------------|
| <b>SGENE-plus</b>           |                |              |       |                  |                |
| England                     | 93             | 88           | 0.051 | 1.51 (0.64,3.56) | 0.35           |
| Finland, excl Kuusamo       | 59             | 147          | 0.044 | 2.22 (0.94,5.27) | 0.070          |
| Finland, Kuusamo            | 123            | 49           | 0.051 | 1.74 (0.64,4.71) | 0.28           |
| Germany, Bonn               | 483            | 366          | 0.048 | 1.56 (1.02,2.37) | 0.040          |
| Germany, Munich             | 574            | 604          | 0.067 | 1.11 (0.81,1.54) | 0.52           |
| Iceland                     | 589            | 11475        | 0.050 | 1.30 (0.99,1.70) | 0.059          |
| Italy                       | 84             | 88           | 0.091 | 0.43 (0.18,1.07) | 0.069          |
| Scotland                    | 658            | 661          | 0.042 | 1.40 (0.97,2.03) | 0.069          |
| <b>2009 Collaboration</b>   |                |              |       |                  |                |
| ISC <sup>1</sup>            | NA             | NA           | NA    | 1.35 (1.12,1.63) | 0.0017         |
| MGS <sup>2</sup>            | NA             | NA           | NA    | 1.18 (0.99,1.39) | 0.061          |
| <b>Primary follow-up</b>    |                |              |       |                  |                |
| Belgium                     | 506            | 341          | 0.062 | 1.18 (0.80,1.75) | 0.39           |
| CATIE <sup>3</sup>          | 391            | 404          | 0.032 | 1.63 (0.93,2.85) | 0.087          |
| Denmark, Aarhus 1           | 220            | 489          | 0.054 | 1.19 (0.74,1.91) | 0.48           |
| Denmark, Aarhus 2           | 878            | 874          | 0.064 | 0.84 (0.63,1.13) | 0.25           |
| Denmark, Copenhagen         | 1289           | 2320         | 0.053 | 1.07 (0.87,1.32) | 0.52           |
| Finland, excl. Kuusamo      | 287            | 3866         | 0.060 | 1.61 (1.15,2.25) | 0.0057         |
| Germany, Bonn               | 603            | 1517         | 0.055 | 1.20 (0.91,1.59) | 0.19           |
| Germany, Munich             | 301            | 1597         | 0.051 | 1.40 (0.98,2.02) | 0.066          |
| Hungary                     | 237            | 213          | 0.045 | 1.76 (1.01,3.08) | 0.048          |
| Ireland <sup>2</sup>        | 1310           | 1023         | 0.038 | 1.21 (0.89,1.64) | 0.23           |
| Italy                       | 134            | 89           | 0.146 | 0.79 (0.45,1.39) | 0.41           |
| Netherlands 1               | 692            | 3681         | 0.062 | 1.30 (1.03,1.64) | 0.027          |
| Netherlands 2               | 176            | 603          | 0.059 | 1.17 (0.72,1.90) | 0.53           |
| Norway                      | 227            | 290          | 0.050 | 1.44 (0.86,2.42) | 0.17           |
| Russia                      | 594            | 740          | 0.057 | 0.88 (0.63,1.24) | 0.48           |
| Spain, Santiago             | 282            | 596          | 0.098 | 0.95 (0.68,1.34) | 0.78           |
| Spain, Valencia             | 323            | 398          | 0.094 | 0.98 (0.69,1.41) | 0.93           |
| Sweden                      | 252            | 285          | 0.044 | 1.83 (1.10,3.05) | 0.02           |
| United Kingdom <sup>2</sup> | 479            | 2937         | NA    | 1.10 (0.80,1.52) | 0.54           |
| <b>Secondary follow-up</b>  |                |              |       |                  |                |
| GRAS                        | 991            | 1141         | 0.056 | 1.09 (0.85,1.41) | 0.50           |

Freq, control frequency <sup>1</sup>rs10401120 (HapMap CEU  $r^2=0.867$ ) <sup>2</sup>imputed <sup>3</sup>rs17511755 (HapMap CEU  $r^2=0.737$ )

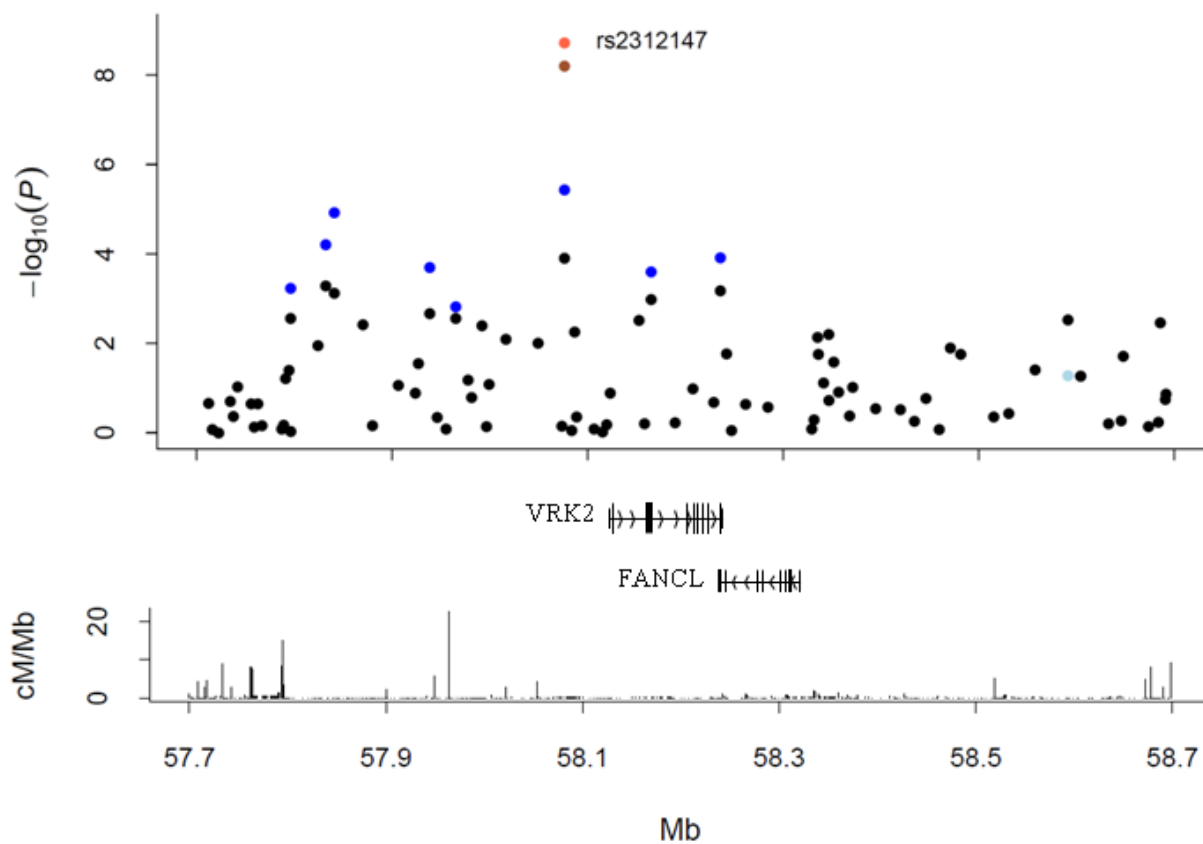

**Figure S1.** Association results and structure of the 2p15.1 region. Top, association results for SGENE-plus (black), SGENE-plus+MGS+ISC (blue, with darker blue indicating SGENE-plus  $r^2$  with rs2312147  $> 0.3$ ), SGENE-plus+MGS+ISC+primary follow-up (brown), and SGENE-plus+MGS+ISC+all follow-up (red). Middle, location of genes in the region. Bottom, estimated recombination rate in the HapMap CEU sample.

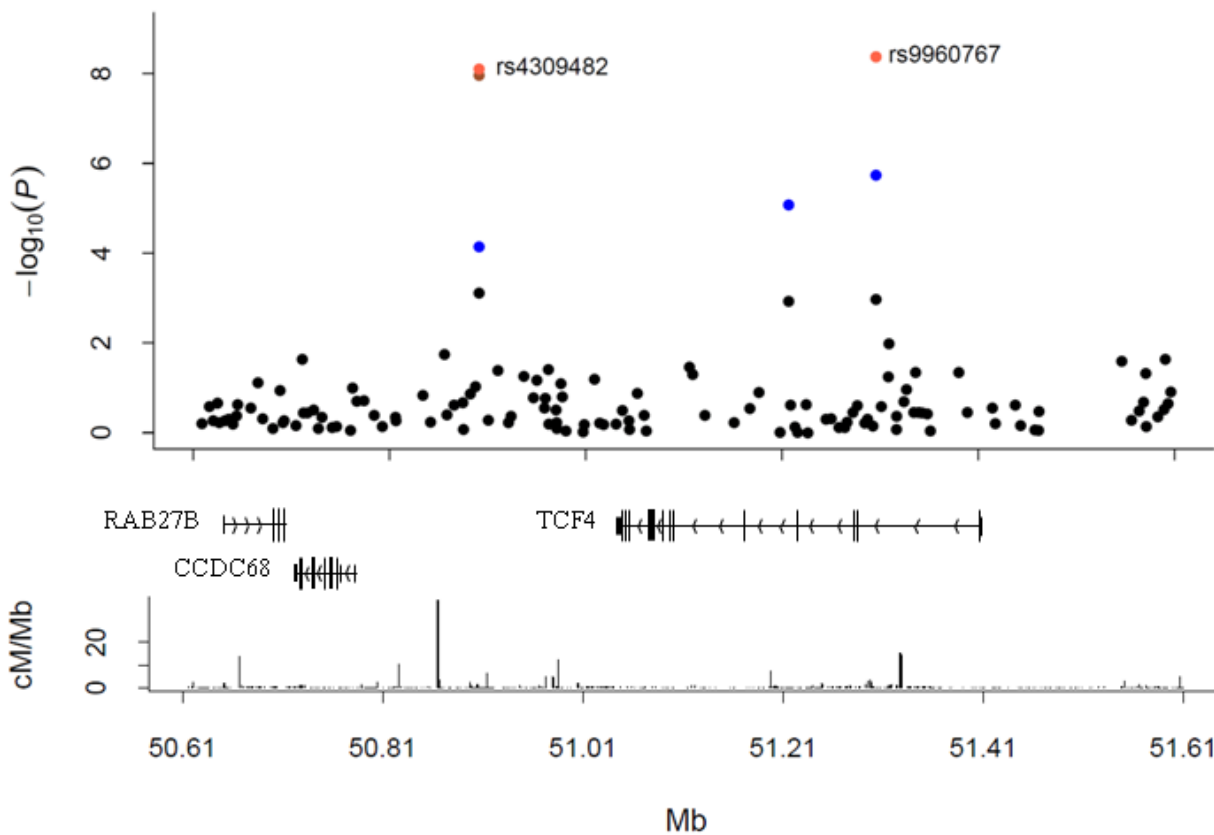

**Figure S2.** Association results and structure of the 18q21.2 region. Top, association results for SGENE-plus (black) SGENE-plus+MGS+ISC (blue, all having SGENE-plus  $r^2 > 0.3$  with rs4309482 or rs9960767), SGENE-plus+MGS+ISC+primary follow-up (brown), and SGENE-plus+MGS+ISC+all follow-up (red). Middle, location of genes in the region. Bottom, estimated recombination rate in the HapMap CEU sample.

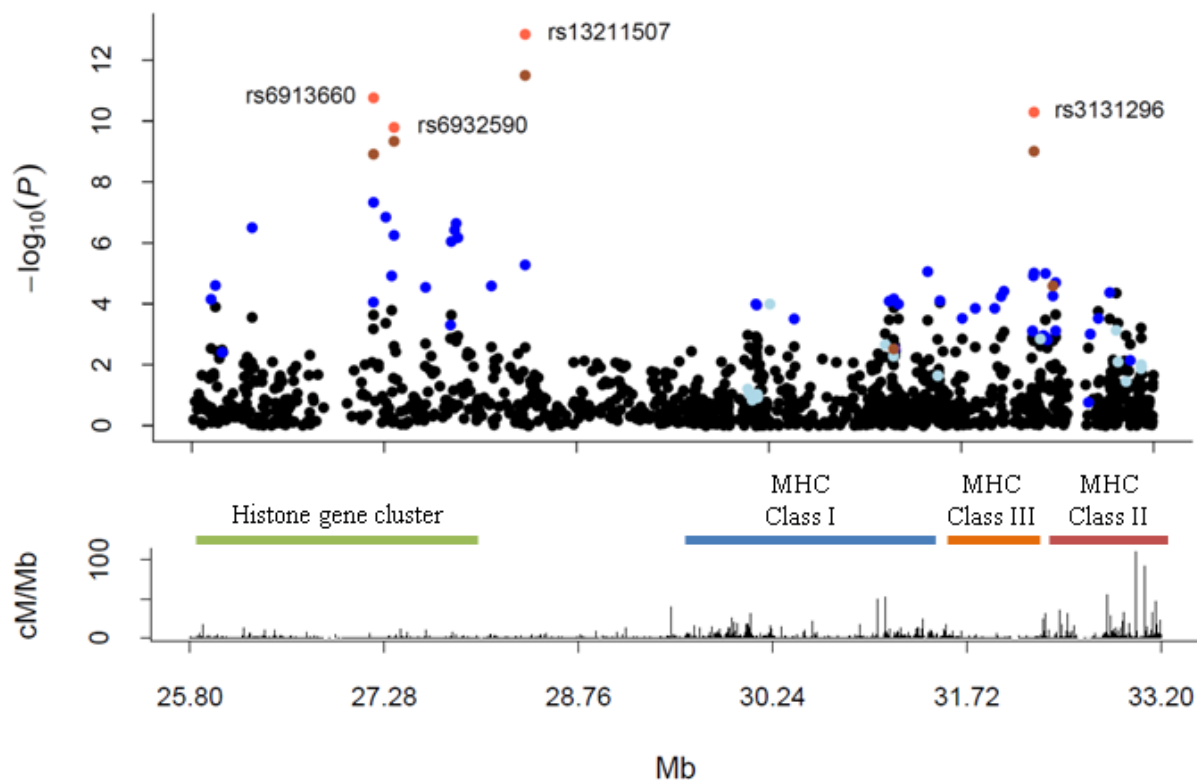

**Figure S3.** Association results and structure of the MHC region. Top, association results for SGENE-plus (black), SGENE-plus+MGS+ISC (blue, with darker blue indicating SGENE-plus  $r^2 > 0.3$  with a SNP that was followed-up), SGENE-plus+MGS+ISC+primary follow-up (brown), and SGENE-plus+MGS+ISC+all follow-up (red). Middle, location of four gene clusters in the region. Bottom, estimated recombination rate in the HapMap CEU sample.

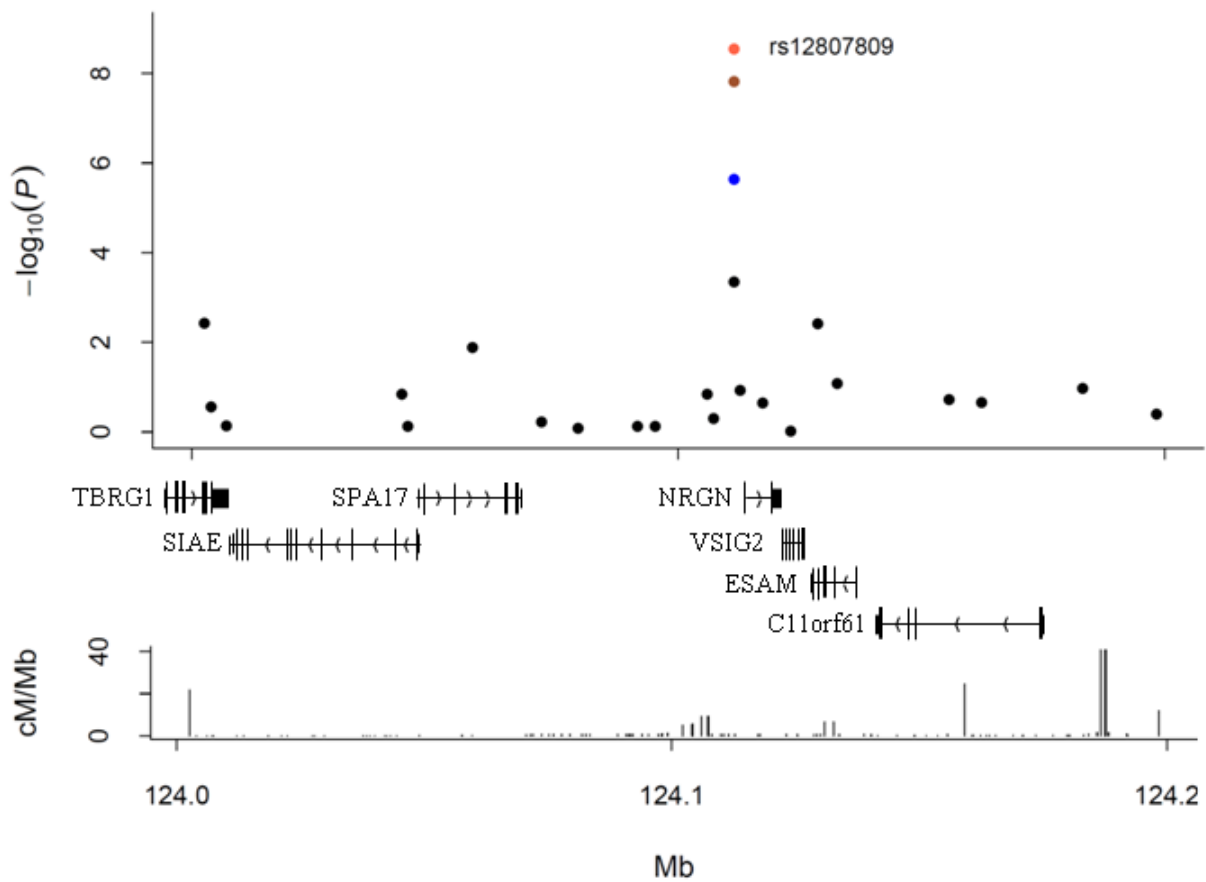

**Figure S4.** Association results and structure of the region. Top, association results for SGENE-plus (black), SGENE-plus+MGS+ISC (blue), SGENE-plus+MGS+ISC+primary follow-up (brown), and SGENE-plus+MGS+ISC+all follow-up (red). Middle, location of genes in the region. Bottom, estimated recombination rate in the HapMap CEU sample.

## References

1. van Es, M.A., van Vught, P.W., Blauw, H.M., Franke, L., Saris, C.G., Van den Bosch, L., de Jong, S.W., de Jong, V., Baas, F., van't Slot, R. *et al.* (2008) Genetic variation in DPP6 is associated with susceptibility to amyotrophic lateral sclerosis. *Nat Genet*, **40**, 29-31.
2. Bagger, Y.Z., Tanko, L.B., Alexandersen, P., Hansen, H.B., Qin, G. and Christiansen, C. (2006) The long-term predictive value of bone mineral density measurements for fracture risk is independent of the site of measurement and the age at diagnosis: results from the Prospective Epidemiological Risk Factors study. *Osteoporos Int*, **17**, 471-7.
3. Ribbe, K., Friedrichs, H., Begemann, M., Grube, S., Papiol, S., Kastner, A., Gerchen, M.F., Ackermann, V., Tarami, A., Treitz, A. *et al.* The cross-sectional GRAS sample: a comprehensive phenotypical data collection of schizophrenic patients. *BMC Psychiatry*, **10**, 91.
4. Purcell, S.M., Wray, N.R., Stone, J.L., Visscher, P.M., O'Donovan, M.C., Sullivan, P.F. and Sklar, P. (2009) Common polygenic variation contributes to risk of schizophrenia and bipolar disorder. *Nature*, **460**, 748-52.
5. First M, S.R., Gibbon M, Williams J (1994) *Structured Clinical Interview for Axis I DSM-IV Disorders*. Biometrics Research, New York.
6. Endicott, J. and Spitzer, R.L. (1978) A diagnostic interview: the schedule for affective disorders and schizophrenia. *Arch Gen Psychiatry*, **35**, 837-44.
7. Wing, J.K., Babor, T., Brugha, T., Burke, J., Cooper, J.E., Giel, R., Jablenski, A., Regier, D. and Sartorius, N. (1990) SCAN. Schedules for Clinical Assessment in Neuropsychiatry. *Arch Gen Psychiatry*, **47**, 589-93.
8. Stefansson, H., Ophoff, R.A., Steinberg, S., Andreassen, O.A., Cichon, S., Rujescu, D., Werge, T., Pietilainen, O.P., Mors, O., Mortensen, P.B. *et al.* (2009) Common variants conferring risk of schizophrenia. *Nature*, **460**, 744-7.
9. Sullivan, P.F., Lin, D., Tzeng, J.Y., van den Oord, E., Perkins, D., Stroup, T.S., Wagner, M., Lee, S., Wright, F.A., Zou, F. *et al.* (2008) Genomewide association for schizophrenia in the CATIE study: results of stage 1. *Mol Psychiatry*, **13**, 570-84.
10. Hollegaard, M.V., Grauholm, J., Borglum, A., Nyegaard, M., Norgaard-Pedersen, B., Orntoft, T., Mortensen, P.B., Wiuf, C., Mors, O., Didriksen, M. *et al.* (2009) Genome-wide scans using archived neonatal dried blood spot samples. *BMC Genomics*, **10**, 297.
11. Barrett, J.C., Lee, J.C., Lees, C.W., Prescott, N.J., Anderson, C.A., Phillips, A., Wesley, E., Parnell, K., Zhang, H., Drummond, H. *et al.* (2009) Genome-wide association study of ulcerative colitis identifies three new susceptibility loci, including the HNF4A region. *Nat Genet*, **41**, 1330-4.
12. Howie, B.N., Donnelly, P. and Marchini, J. (2009) A flexible and accurate genotype imputation method for the next generation of genome-wide association studies. *PLoS Genet*, **5**, e1000529.

13. Strange, A., Capon, F., Spencer, C.C., Knight, J., Weale, M.E., Allen, M.H., Barton, A., Band, G., Bellenguez, C., Bergboer, J.G. *et al.* A genome-wide association study identifies new psoriasis susceptibility loci and an interaction between HLA-C and ERAP1. *Nat Genet*, **42**, 985-90.
14. O'Donovan, M.C., Craddock, N., Norton, N., Williams, H., Peirce, T., Moskvina, V., Nikolov, I., Hamshere, M., Carroll, L., Georgieva, L. *et al.* (2008) Identification of loci associated with schizophrenia by genome-wide association and follow-up. *Nat Genet*, **40**, 1053-5.
15. Li, Y., Willer, C.J., Ding, J., Scheet, P. and Abecasis, G.R. MaCH: using sequence and genotype data to estimate haplotypes and unobserved genotypes. *Genet Epidemiol.*
16. Li, Y., Willer, C., Sanna, S. and Abecasis, G. (2009) Genotype imputation. *Annu Rev Genomics Hum Genet*, **10**, 387-406.
17. Shi, J., Levinson, D.F., Duan, J., Sanders, A.R., Zheng, Y., Pe'er, I., Dudbridge, F., Holmans, P.A., Whittemore, A.S., Mowry, B.J. *et al.* (2009) Common variants on chromosome 6p22.1 are associated with schizophrenia. *Nature*, **460**, 753-7.
